# Supplementary material
Source: PubMed Central journal article supplement (PMC4097591)
Supplement: JB.01650-14_zjb999093227so1.pdf [file JB.01650-14_zjb999093227so1.pdf]

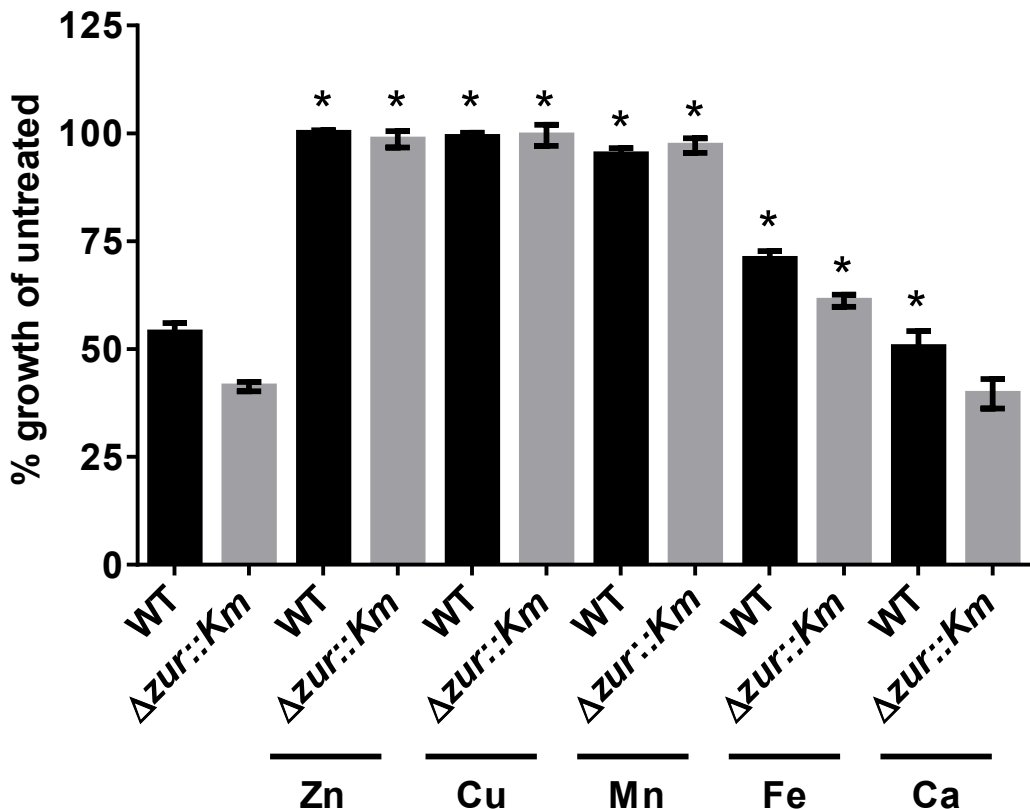

**Supplementary Figure 1. Complementation of *zur* mutant growth defect in low Zn with addition of exogenous metal.** WT and  $\Delta zur::Km$  strains were grown in the presence of 20  $\mu$ M TPEN. Graph depicts percent growth of TPEN-treated wild-type and  $\Delta zur::Km$  over untreated (LB only) from the 8 hour time point. Designated metals were added back to a 25  $\mu$ M concentration in the media, except for Fe, which was added to a 10  $\mu$ M concentration. Statistical significance was determined by Student's *t* test for WT or  $\Delta zur::Km$  strains with metal added back compared to the respective strain in TPEN only.  $p < 0.05$ .
